# Supplementary material for: A combined spectroscopic and computational investigation on the solvent-to-chromophore excited-state proton transfer in the 2,2′-pyridylbenzimidazole–methanol complex
Source: Royal Society of Chemistry journal article supplement (doi:10.1039/d3cp01742g), 2023-01-01
Supplement: d3cp01742g1.pdf [file d3cp01742g1.pdf]

Supporting Information for

## A Combined Spectroscopic and Computational Investigation on the Solvent-to-Chromophore Excited-State Proton Transfer in the 2,2'-Pyridylbenzimidazole-Methanol complex

Ramesh Jarupula,<sup>‡,a</sup> Saurabh Khodia,<sup>‡,a</sup> Md. Shabeeb<sup>a</sup> and Surajit Maity<sup>\*a</sup>

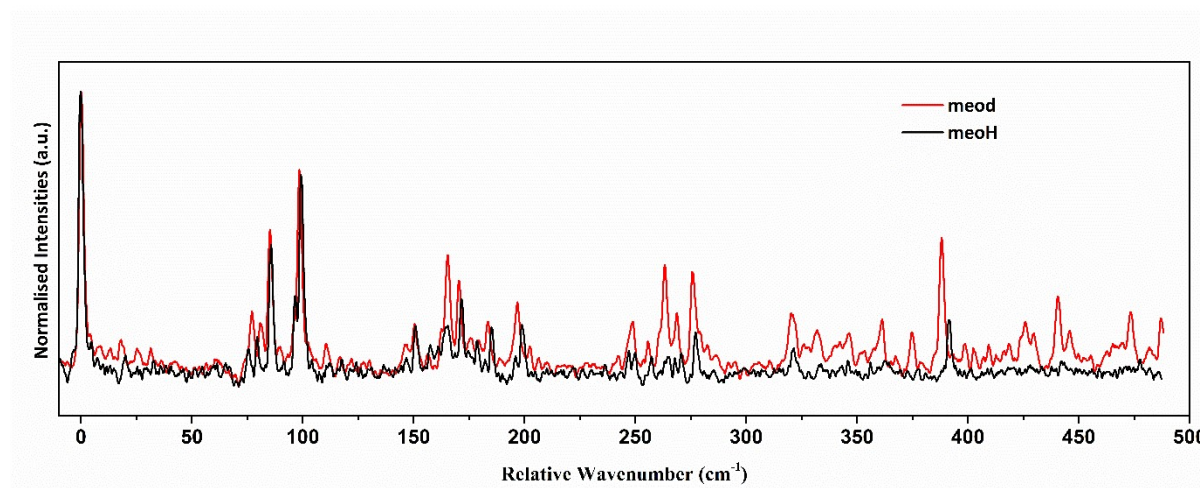

**Figure S1.** To compare the kinetic isotope effect, the baseline corrected normalized R2PI spectra of PBI-CH<sub>3</sub>OD and PBI-CH<sub>3</sub>OH of all the vibrational modes. The ID/IH values are given in Table 2 of the article, calculated by integrating each peak. Both the spectra were recorded using identical experimental conditions (including the identical set of lasers). The normalization was done at the band origin transitions only. The band origin and transition to  $\nu_{45}$  band at 97 cm<sup>-1</sup> have shown nearly identical intensity patterns in both the systems, which confirms the correctness of the normalization methods.

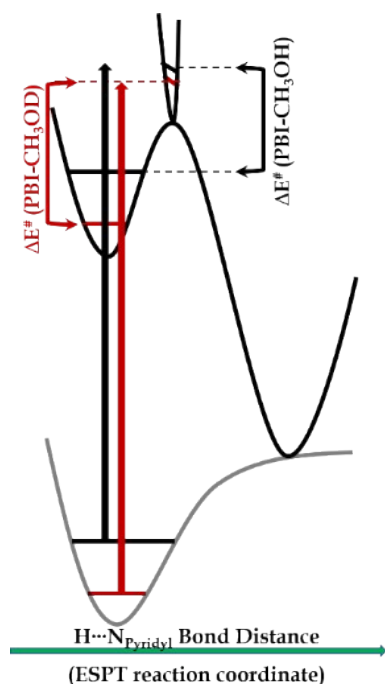

**Scheme S1:** The effect of isotopic substitution on the zero-point energy and energy barriers of a reaction. The ZPE corrected energy barrier in PBI-CH<sub>3</sub>OD, i.e., the  $\Delta E^\ddagger(\text{PBI-CH}_3\text{OD})$  is higher than the same in PBI-CH<sub>3</sub>OH complex.

**Table S1:** Charges on H(4), H(2) and CH<sub>3</sub>O species in each structure along the ESPT and ESHT pathways.

| Sr. no (Str.)         | ESHT pathway     |        |        |                   |
|-----------------------|------------------|--------|--------|-------------------|
|                       | d(N(5)-H(4)) (Å) | H(2)   | H(4)   | CH <sub>3</sub> O |
| 1 (str-a)             | 1.619            | 0      | 0      | 0                 |
| 2                     | 1.576            | 0.002  | 0.001  | 0.016             |
| 3                     | 1.533            | 0.002  | 0.002  | 0.038             |
| 4 (TS <sub>HT</sub> ) | 1.490            | 0.004  | 0.001  | 0.063             |
| 5                     | 1.447            | 0.011  | -0.003 | 0.081             |
| 6                     | 1.404            | 0.034  | 0.01   | 0.09              |
| 7                     | 1.361            | 0.032  | -0.013 | 0.09              |
| 8                     | 1.318            | 0.042  | -0.017 | 0.08              |
| 9                     | 1.275            | 0.05   | -0.019 | 0.065             |
| 10                    | 1.232            | 0.056  | -0.017 | 0.046             |
| 11                    | 1.189            | 0.06   | -0.014 | 0.026             |
| 12                    | 1.146            | 0.062  | -0.011 | 0.01              |
| 13                    | 1.103            | 0.062  | -0.011 | -0.001            |
| 14                    | 1.060            | 0.062  | -0.015 | -0.008            |
| 15 (str-b)            | 1.017            | 0.062  | -0.021 | -0.012            |
| ESPT pathway          |                  |        |        |                   |
| 1 (str-a)             | 1.619            | 0      | 0      | 0                 |
| 2                     | 1.532            | 0      | -0.008 | -0.011            |
| 3                     | 1.445            | 0.001  | -0.018 | -0.026            |
| 4 (TS <sub>PT</sub> ) | 1.358            | 0.001  | -0.029 | -0.047            |
| 5                     | 1.271            | -0.006 | -0.022 | -0.228            |
| 6 (str-d)             | 1.184            | 0.005  | -0.008 | -0.299            |
| 7                     | 1.097            | 0.028  | -0.003 | -0.328            |
| 8 (str-e)             | 1.010            | 0.026  | -0.016 | -0.343            |

**SI Table S2:** Cartesian Coordinates of the optimized structures of PBI monomer, PBI-CH<sub>3</sub>OH complex in the ground state S<sub>0</sub> and excited state S<sub>1</sub>, calculated using B3LYP-D4/def2-TZVPP level of theory.

**PBI-monomer (normal form)**

| Ground State S <sub>0</sub> |      |         |         |   | Excited State S <sub>1</sub> |      |         |         |   |
|-----------------------------|------|---------|---------|---|------------------------------|------|---------|---------|---|
|                             | Atom | X       | Y       | Z |                              | Atom | X       | Y       | Z |
| 1                           | C    | -2.4372 | 1.3494  | 0 | 1                            | C    | -2.4595 | 1.3664  | 0 |
| 2                           | H    | 5.1449  | 1.0002  | 0 | 2                            | H    | 5.1897  | 0.9625  | 0 |
| 3                           | N    | -2.3468 | -1.0533 | 0 | 3                            | N    | -2.319  | -1.0845 | 0 |
| 4                           | H    | 5.0267  | -1.4533 | 0 | 4                            | H    | 5.0159  | -1.4909 | 0 |
| 5                           | H    | -5.5373 | -0.0026 | 0 | 5                            | H    | -5.528  | -0.0703 | 0 |
| 6                           | C    | -3.8205 | 1.3083  | 0 | 6                            | C    | -3.8364 | 1.3068  | 0 |
| 7                           | C    | 1.7457  | -0.7672 | 0 | 7                            | C    | 1.7305  | -0.754  | 0 |
| 8                           | H    | 2.8487  | -2.6322 | 0 | 8                            | H    | 2.7912  | -2.6215 | 0 |
| 9                           | N    | 0.4043  | -1.0687 | 0 | 9                            | N    | 0.3713  | -1.0261 | 0 |
| 10                          | C    | 3.0297  | 1.2998  | 0 | 10                           | C    | 3.0678  | 1.2962  | 0 |
| 11                          | C    | 4.1082  | -0.8821 | 0 | 11                           | C    | 4.1212  | -0.8852 | 0 |
| 12                          | N    | 0.5151  | 1.1647  | 0 | 12                           | N    | 0.5697  | 1.219   | 0 |
| 13                          | C    | -1.739  | 0.141   | 0 | 13                           | C    | -1.7258 | 0.1676  | 0 |
| 14                          | C    | -4.4591 | 0.0732  | 0 | 14                           | C    | -4.4528 | 0.035   | 0 |
| 15                          | C    | 2.8943  | -1.5516 | 0 | 15                           | C    | 2.8461  | -1.5416 | 0 |
| 16                          | C    | -0.28   | 0.1192  | 0 | 16                           | C    | -0.3004 | 0.1526  | 0 |
| 17                          | H    | -0.0484 | -1.967  | 0 | 17                           | H    | -0.1273 | -1.9047 | 0 |
| 18                          | H    | -4.1395 | -2.0554 | 0 | 18                           | H    | -4.1025 | -2.0853 | 0 |
| 19                          | C    | 1.7951  | 0.6484  | 0 | 19                           | C    | 1.7974  | 0.6708  | 0 |
| 20                          | H    | -4.3948 | 2.225   | 0 | 20                           | H    | -4.4281 | 2.2114  | 0 |
| 21                          | H    | -1.8851 | 2.2774  | 0 | 21                           | H    | -1.9284 | 2.3082  | 0 |
| 22                          | C    | 4.1749  | 0.5218  | 0 | 22                           | C    | 4.2155  | 0.4947  | 0 |
| 23                          | H    | 3.077   | 2.3798  | 0 | 23                           | H    | 3.1325  | 2.3751  | 0 |
| 24                          | C    | -3.6767 | -1.0751 | 0 | 24                           | C    | -3.6406 | -1.1022 | 0 |

**PBI-CH<sub>3</sub>OH (initial structure normal form)**

| Ground State S <sub>0</sub> |      |         |         |         | Excited State S <sub>1</sub> |      |         |         |         |
|-----------------------------|------|---------|---------|---------|------------------------------|------|---------|---------|---------|
|                             | Atom | X       | Y       | Z       |                              | Atom | X       | Y       | Z       |
| 1                           | C    | 2.9817  | 1.3315  | -0.1908 | 1                            | C    | 3.0113  | 1.3049  | -0.1349 |
| 2                           | H    | -5.5799 | 0.3101  | 0.1433  | 2                            | H    | -5.5775 | 0.13    | 0.1616  |
| 3                           | H    | 5.0228  | -1.362  | 0.1905  | 3                            | H    | 5.0177  | -1.4769 | 0.1898  |
| 4                           | C    | -3.8    | -0.8799 | 0.2617  | 4                            | C    | -3.7467 | -0.9459 | 0.2534  |
| 5                           | C    | -1.7664 | 0.18    | 0.0813  | 5                            | C    | -1.7637 | 0.2409  | 0.0454  |
| 6                           | C    | 4.138   | 0.5784  | -0.0965 | 6                            | C    | 4.1932  | 0.4817  | -0.0438 |
| 7                           | N    | -2.4688 | -0.9521 | 0.243   | 7                            | N    | -2.399  | -0.9866 | 0.2206  |
| 8                           | C    | -4.4997 | 0.3078  | 0.1205  | 8                            | C    | -4.4995 | 0.1959  | 0.1217  |

## Supporting Information for

|    |   |         |         |         |    |   |         |         |         |
|----|---|---------|---------|---------|----|---|---------|---------|---------|
| 9  | C | 2.8938  | -1.4894 | 0.2514  | 9  | C | 2.8659  | -1.5143 | 0.2085  |
| 10 | H | 3.0111  | 2.3993  | -0.3576 | 10 | H | 3.1019  | 2.3739  | -0.2653 |
| 11 | H | 5.1002  | 1.0632  | -0.1912 | 11 | H | 5.1591  | 0.9617  | -0.1085 |
| 12 | H | -4.3257 | -1.8178 | 0.3973  | 12 | H | -4.2375 | -1.9026 | 0.397   |
| 13 | H | -1.7764 | 2.2994  | -0.1957 | 13 | H | -1.8893 | 2.344   | -0.2261 |
| 14 | C | -2.3916 | 1.4218  | -0.069  | 14 | C | -2.4543 | 1.4318  | -0.0947 |
| 15 | C | 1.7309  | -0.7295 | 0.155   | 15 | C | 1.7171  | -0.7037 | 0.1175  |
| 16 | N | 0.3998  | -1.0573 | 0.2315  | 16 | N | 0.4086  | -0.9982 | 0.163   |
| 17 | C | 4.0944  | -0.8113 | 0.1217  | 17 | C | 4.116   | -0.8869 | 0.1232  |
| 18 | H | 0.0029  | -1.9877 | 0.3761  | 18 | H | -0.0261 | -1.9463 | 0.2626  |
| 19 | H | -4.2782 | 2.4308  | -0.1627 | 19 | H | -4.3958 | 2.3663  | -0.1711 |
| 20 | H | 2.8638  | -2.5568 | 0.4218  | 20 | H | 2.7814  | -2.5833 | 0.3429  |
| 21 | C | -0.3065 | 0.1062  | 0.0635  | 21 | C | -0.3092 | 0.2211  | 0.0257  |
| 22 | C | -3.772  | 1.4816  | -0.049  | 22 | C | -3.8422 | 1.4468  | -0.0635 |
| 23 | C | 1.758   | 0.6689  | -0.0631 | 23 | C | 1.7901  | 0.7035  | -0.0521 |
| 24 | N | 0.472   | 1.1553  | -0.1139 | 24 | N | 0.5036  | 1.2351  | -0.1037 |
| 25 | O | -1.1688 | -3.4146 | 0.4339  | 25 | O | -1.0568 | -3.2316 | 0.3998  |
| 26 | H | -1.7737 | -2.6406 | 0.4113  | 26 | H | -1.7009 | -2.4387 | 0.3819  |
| 27 | C | -1.251  | -4.088  | -0.8139 | 27 | C | -1.2718 | -4.0135 | -0.7618 |
| 28 | H | -0.4894 | -4.8665 | -0.8228 | 28 | H | -0.4589 | -4.7352 | -0.8531 |
| 29 | H | -2.2283 | -4.5606 | -0.9528 | 29 | H | -2.2134 | -4.5673 | -0.6986 |
| 30 | H | -1.0674 | -3.4118 | -1.6558 | 30 | H | -1.2976 | -3.3983 | -1.6684 |

PBI-CH<sub>3</sub>OH Transition state along ESHT and ESPT

| S <sub>1</sub> TS-ESHT |      |         |         |         | S <sub>1</sub> TS-ESPT |      |         |         |         |
|------------------------|------|---------|---------|---------|------------------------|------|---------|---------|---------|
|                        | Atom | X       | Y       | Z       |                        | Atom | X       | Y       | Z       |
| 1                      | C    | 2.9923  | 1.2678  | -0.1377 | 1                      | C    | 3.2774  | 1.6149  | -0.1777 |
| 2                      | H    | -5.6092 | 0.1698  | 0.1463  | 2                      | H    | -5.3564 | 0.7282  | 0.1245  |
| 3                      | H    | 4.9917  | -1.5191 | 0.1538  | 3                      | H    | 5.1788  | -1.2319 | 0.2005  |
| 4                      | C    | -3.8121 | -0.9398 | 0.2631  | 4                      | C    | -3.5716 | -0.405  | 0.2398  |
| 5                      | C    | -1.7957 | 0.2148  | 0.0561  | 5                      | C    | -1.5408 | 0.7223  | 0.0109  |
| 6                      | C    | 4.1674  | 0.4424  | -0.0607 | 6                      | C    | 4.4269  | 0.7502  | -0.0707 |
| 7                      | N    | -2.4449 | -0.9974 | 0.2377  | 7                      | N    | -2.2141 | -0.4789 | 0.2063  |
| 8                      | C    | -4.5288 | 0.2178  | 0.1133  | 8                      | C    | -4.2764 | 0.7587  | 0.0843  |
| 9                      | C    | 2.8429  | -1.5578 | 0.1901  | 9                      | C    | 3.0281  | -1.1911 | 0.2233  |
| 10                     | H    | 3.0829  | 2.3375  | -0.2617 | 10                     | H    | 3.4071  | 2.677   | -0.3292 |
| 11                     | H    | 5.1357  | 0.9173  | -0.1291 | 11                     | H    | 5.4101  | 1.1919  | -0.1462 |
| 12                     | H    | -4.3168 | -1.8855 | 0.4147  | 12                     | H    | -4.0824 | -1.3459 | 0.4013  |
| 13                     | H    | -1.8647 | 2.2996  | -0.2335 | 13                     | H    | -1.5921 | 2.8112  | -0.2955 |
| 14                     | C    | -2.4496 | 1.4017  | -0.0985 | 14                     | C    | -2.1866 | 1.9205  | -0.1508 |
| 15                     | C    | 1.6926  | -0.7473 | 0.1127  | 15                     | C    | 1.9105  | -0.34   | 0.1166  |
| 16                     | N    | 0.3897  | -1.0529 | 0.1657  | 16                     | N    | 0.5929  | -0.5872 | 0.1699  |
| 17                     | C    | 4.0883  | -0.9303 | 0.0988  | 17                     | C    | 4.2991  | -0.6108 | 0.1238  |

## Supporting Information for

|    |   |         |         |         |    |   |         |         |          |
|----|---|---------|---------|---------|----|---|---------|---------|----------|
| 18 | H | -0.1536 | -2.135  | 0.2881  | 18 | H | 0.1054  | -1.5087 | 0.2733   |
| 19 | H | -4.3981 | 2.3781  | -0.1985 | 19 | H | -4.111  | 2.9165  | -0.2512  |
| 20 | H | 2.761   | -2.6276 | 0.3197  | 20 | H | 2.9039  | -2.2533 | 0.3777   |
| 21 | C | -0.3133 | 0.1698  | 0.0383  | 21 | C | -0.0731 | 0.6484  | 4.00E-04 |
| 22 | C | -3.8634 | 1.4505  | -0.0796 | 22 | C | -3.5872 | 1.9832  | -0.1248  |
| 23 | C | 1.7763  | 0.663   | -0.0494 | 23 | C | 2.0371  | 1.0581  | -0.0829  |
| 24 | N | 0.4802  | 1.1905  | -0.0889 | 24 | N | 0.7653  | 1.6328  | -0.1482  |
| 25 | O | -1.0148 | -3.0992 | 0.4216  | 25 | O | -0.9813 | -2.618  | 0.391    |
| 26 | H | -1.7535 | -2.3076 | 0.397   | 26 | H | -1.6229 | -1.6952 | 0.3301   |
| 27 | C | -1.1461 | -3.8991 | -0.7488 | 27 | C | -1.1989 | -3.4254 | -0.7415  |
| 28 | H | -0.2596 | -4.525  | -0.8542 | 28 | H | -0.3884 | -4.1531 | -0.8447  |
| 29 | H | -2.0198 | -4.5463 | -0.6608 | 29 | H | -2.1373 | -3.986  | -0.6599  |
| 30 | H | -1.2572 | -3.2796 | -1.6435 | 30 | H | -1.2452 | -2.8364 | -1.6684  |

PBI-CH<sub>3</sub>OH ESHT and ESPT Products

| S <sub>1</sub> ESHT Product (Structure-b) |      |         |         |         | S <sub>1</sub> ESPT Product (Structure-e) |      |         |         |         |
|-------------------------------------------|------|---------|---------|---------|-------------------------------------------|------|---------|---------|---------|
|                                           | Atom | X       | Y       | Z       |                                           | Atom | X       | Y       | Z       |
| 1                                         | C    | 3.0078  | 1.2896  | -0.147  | 1                                         | C    | 3.2619  | 1.6696  | -0.1577 |
| 2                                         | H    | -5.6322 | 0.2645  | 0.2044  | 2                                         | H    | -5.3796 | 0.9875  | 0.1535  |
| 3                                         | H    | 4.9621  | -1.5132 | 0.1699  | 3                                         | H    | 5.1779  | -1.1199 | 0.1865  |
| 4                                         | C    | -3.8566 | -0.8785 | 0.3084  | 4                                         | C    | -3.6911 | -0.2703 | 0.2087  |
| 5                                         | C    | -1.7888 | 0.3027  | 0.0591  | 5                                         | C    | -1.5185 | 0.7448  | -0.0245 |
| 6                                         | C    | 4.1723  | 0.454   | -0.0636 | 6                                         | C    | 4.3865  | 0.8636  | -0.0527 |
| 7                                         | N    | -2.4734 | -0.8687 | 0.2584  | 7                                         | N    | -2.3273 | -0.384  | 0.1149  |
| 8                                         | C    | -4.5522 | 0.299   | 0.1562  | 8                                         | C    | -4.3024 | 0.9371  | 0.1168  |
| 9                                         | C    | 2.8051  | -1.521  | 0.2049  | 9                                         | C    | 3.0397  | -1.1535 | 0.1625  |
| 10                                        | H    | 3.1081  | 2.358   | -0.2788 | 10                                        | H    | 3.3414  | 2.7395  | -0.2913 |
| 11                                        | H    | 5.1473  | 0.915   | -0.1364 | 11                                        | H    | 5.3698  | 1.3135  | -0.0817 |
| 12                                        | H    | -4.3184 | -1.8364 | 0.4757  | 12                                        | H    | -4.2302 | -1.1907 | 0.3611  |
| 13                                        | H    | -1.8724 | 2.3656  | -0.252  | 13                                        | H    | -1.4896 | 2.8429  | -0.2024 |
| 14                                        | C    | -2.448  | 1.4675  | -0.0979 | 14                                        | C    | -2.1356 | 1.983   | -0.1119 |
| 15                                        | C    | 1.6718  | -0.7069 | 0.1195  | 15                                        | C    | 1.9174  | -0.3424 | 0.0618  |
| 16                                        | N    | 0.3538  | -1.0262 | 0.1762  | 16                                        | N    | 0.5643  | -0.6106 | 0.0764  |
| 17                                        | C    | 4.0696  | -0.9076 | 0.1078  | 17                                        | C    | 4.2783  | -0.5252 | 0.1049  |
| 18                                        | H    | -0.363  | -2.708  | 0.3458  | 18                                        | H    | 0.1197  | -1.5364 | 0.283   |
| 19                                        | H    | -4.426  | 2.426   | -0.172  | 19                                        | H    | -3.9789 | 3.0795  | -0.132  |
| 20                                        | H    | 2.7131  | -2.5894 | 0.3453  | 20                                        | H    | 2.9611  | -2.2256 | 0.2802  |
| 21                                        | C    | -0.2876 | 0.1934  | 0.0402  | 21                                        | C    | -0.0889 | 0.6007  | -0.0327 |
| 22                                        | C    | -3.8902 | 1.499   | -0.0518 | 22                                        | C    | -3.5127 | 2.1095  | -0.0562 |
| 23                                        | C    | 1.7869  | 0.6919  | -0.0536 | 23                                        | C    | 2.0088  | 1.0599  | -0.0958 |
| 24                                        | N    | 0.4861  | 1.2311  | -0.0984 | 24                                        | N    | 0.7492  | 1.6127  | -0.1499 |
| 25                                        | O    | -1.0531 | -3.4014 | 0.4096  | 25                                        | O    | -1.0395 | -3.0639 | 0.4362  |
| 26                                        | H    | -1.9832 | -1.753  | 0.3672  | 26                                        | H    | -1.9031 | -1.2931 | 0.2325  |

## Supporting Information for

|    |   |         |         |         |    |   |         |         |         |
|----|---|---------|---------|---------|----|---|---------|---------|---------|
| 27 | C | -1.0842 | -4.1249 | -0.8106 | 27 | C | -1.0912 | -3.7679 | -0.7162 |
| 28 | H | -0.1899 | -4.7437 | -0.9364 | 28 | H | -0.3383 | -4.5706 | -0.7466 |
| 29 | H | -1.953  | -4.7816 | -0.7881 | 29 | H | -2.0571 | -4.3137 | -0.7504 |
| 30 | H | -1.1731 | -3.4617 | -1.6779 | 30 | H | -1.0336 | -3.156  | -1.6275 |

PBI-CH<sub>3</sub>OH ESPT Product (Structure-d)

| S1 ESPT Product (Structure-d) |      |         |         |         |
|-------------------------------|------|---------|---------|---------|
|                               | Atom | X       | Y       | Z       |
| 1                             | C    | 3.3071  | 1.7394  | -0.3776 |
| 2                             | H    | -5.293  | 0.9199  | 0.3116  |
| 3                             | H    | 5.3238  | -0.8795 | 0.4313  |
| 4                             | C    | -3.598  | -0.3297 | 0.2052  |
| 5                             | C    | -1.434  | 0.6908  | -0.0197 |
| 6                             | C    | 4.4603  | 1.0048  | -0.1381 |
| 7                             | N    | -2.2464 | -0.4434 | 0.0485  |
| 8                             | C    | -4.2206 | 0.8754  | 0.2034  |
| 9                             | C    | 3.1866  | -0.9953 | 0.4114  |
| 10                            | H    | 3.3477  | 2.7775  | -0.6767 |
| 11                            | H    | 5.4263  | 1.4785  | -0.2507 |
| 12                            | H    | -4.1394 | -1.2568 | 0.3007  |
| 13                            | H    | -1.4224 | 2.8002  | -0.1006 |
| 14                            | C    | -2.0673 | 1.9367  | -0.0381 |
| 15                            | C    | 2.0395  | -0.2555 | 0.1724  |
| 16                            | N    | 0.6918  | -0.5757 | 0.2245  |
| 17                            | C    | 4.4042  | -0.3393 | 0.2527  |
| 18                            | H    | 0.3191  | -1.3671 | 0.8008  |
| 19                            | H    | -3.9022 | 3.0304  | 0.0222  |
| 20                            | H    | 3.1478  | -2.0338 | 0.7116  |
| 21                            | C    | -0.0113 | 0.59    | -0.0568 |
| 22                            | C    | -3.4335 | 2.0587  | 0.0512  |
| 23                            | C    | 2.0754  | 1.1037  | -0.2127 |
| 24                            | N    | 0.7992  | 1.5954  | -0.3505 |
| 25                            | O    | -1.5352 | -3.268  | 0.2371  |
| 26                            | H    | -1.8117 | -1.5416 | 0.1313  |
| 27                            | C    | -1.5232 | -3.9625 | -0.9197 |
| 28                            | H    | -1.0674 | -4.9563 | -0.8454 |
| 29                            | H    | -2.5876 | -4.1291 | -1.1987 |
| 30                            | H    | -1.1182 | -3.3843 | -1.765  |
